# Supplementary material for: Conflation of Short Identity-by-Descent Segments Bias Their Inferred Length Distribution
Source: PubMed Central journal article supplement (PMC4856080; doi:10.1534/g3.116.027581), 2016-03-01
Supplement: supp_g3.116.027581_FigureS1.pdf [file supp_g3.116.027581_FigureS1.pdf]

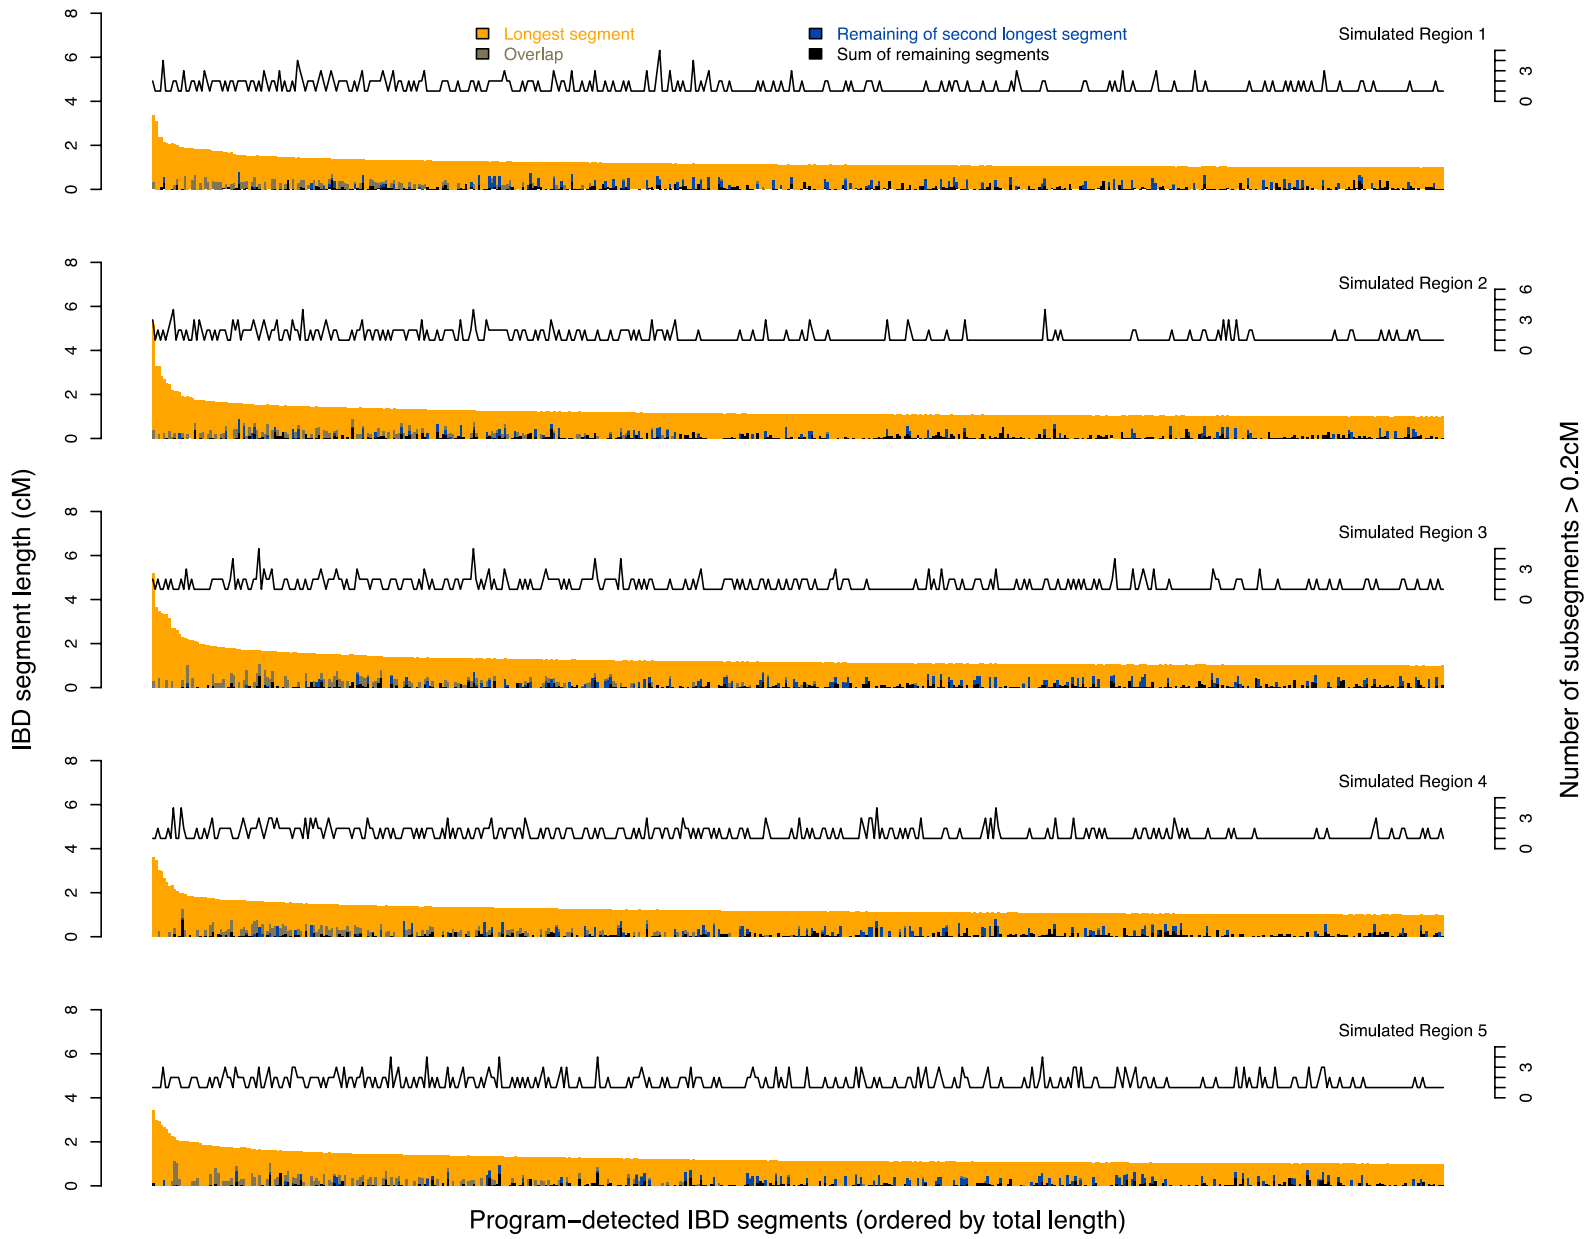

**Figure S1:** The prevalence of subsegments among IBD<sub>called</sub> segments by Refined IBD

For ease of viewing, each barplot displays a random sample of 500 IBD segments detected by Beagle from each of the five simulated regions. Please refer to the legend of **Figure 2** for the color annotation of each IBD segment.
