# Supplementary material for: Conflation of Short Identity-by-Descent Segments Bias Their Inferred Length Distribution
Source: PubMed Central journal article supplement (PMC4856080; doi:10.1534/g3.116.027581), 2016-03-01
Supplement: supp_g3.116.027581_FigureS3.pdf [file supp_g3.116.027581_FigureS3.pdf]

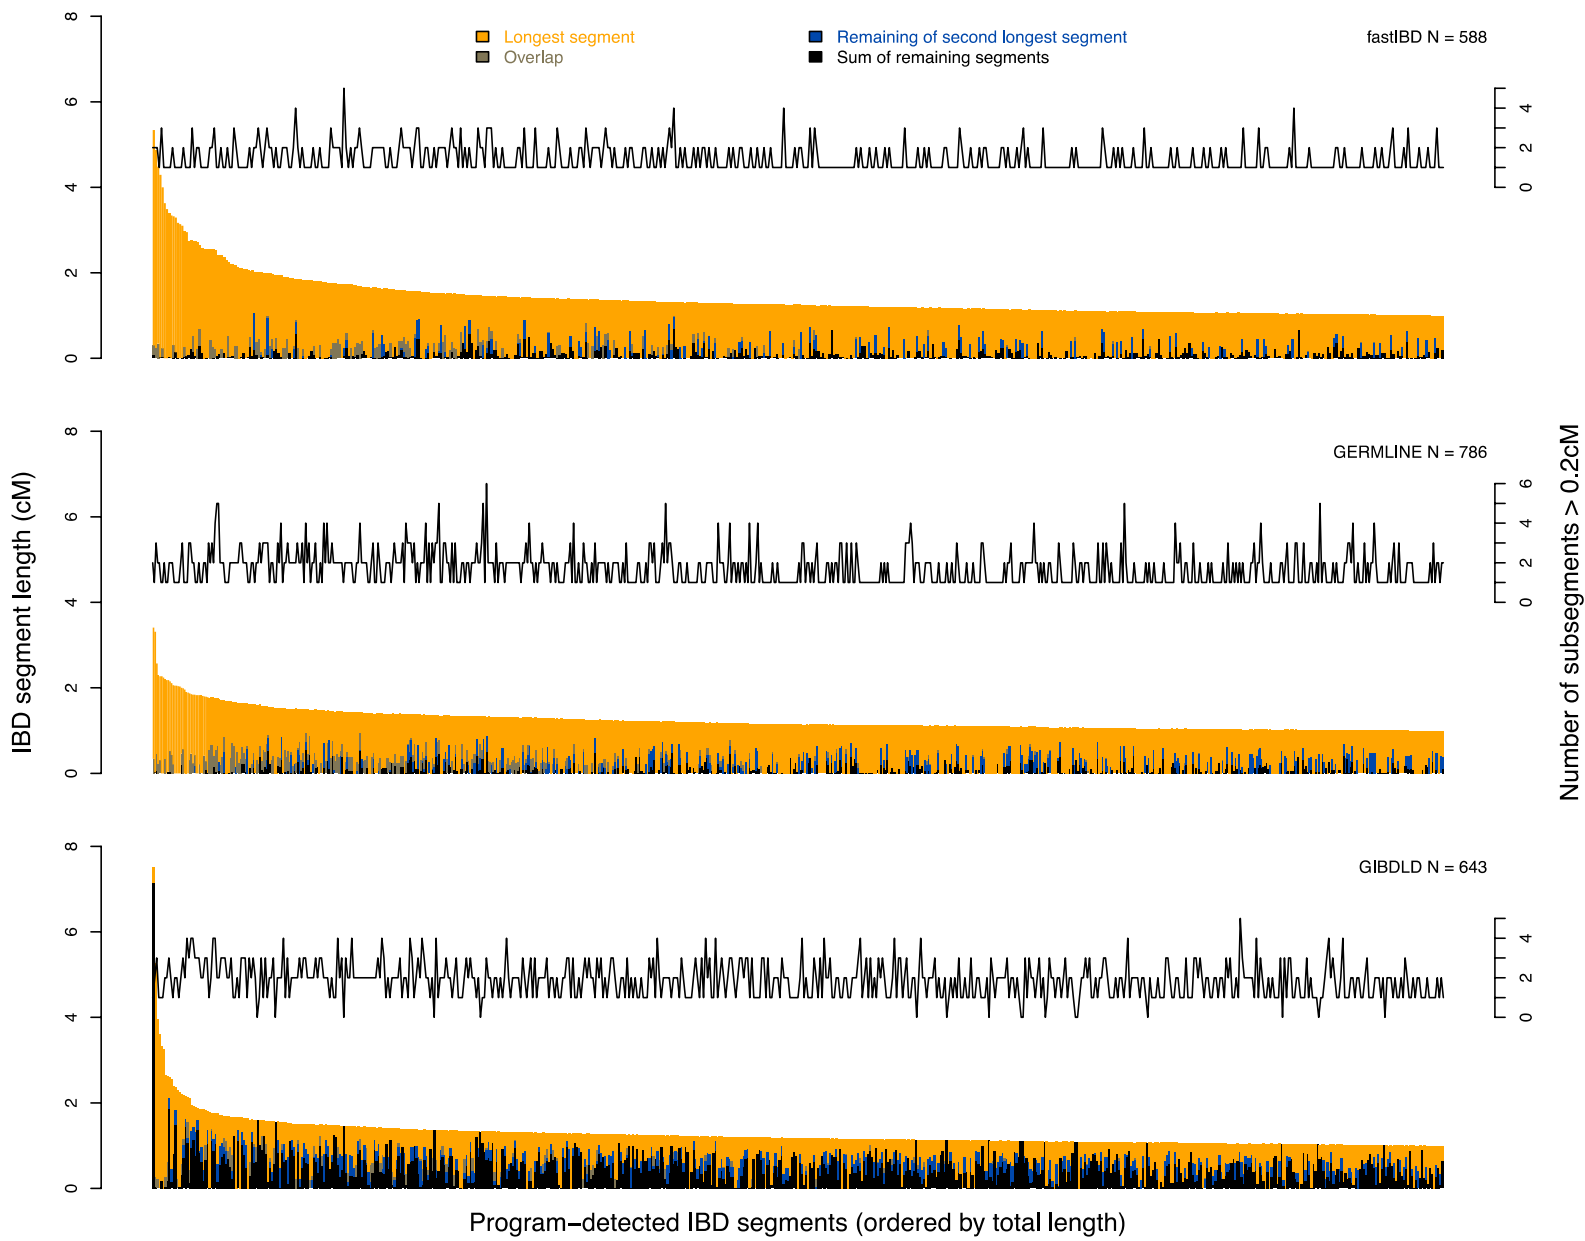

**Figure S3:** The prevalence of subsegments among IBD<sub>called</sub> segments detected by fastIBD, GERMLINE, and IBDLD.

The barplots display the IBD<sub>called</sub> segments detected by fastIBD, GERMLINE, and IBDLD from one of the simulated regions. Please refer to the legend of **Figure 2** for the color annotation of each IBD segment. IBDLD appears to perform the worst in detecting non-conflated IBD segments. However, we note that IBDLD attempts to detect IBD segments using an HMM that assigns each position in the genome to one of 9 possible IBD states between the two diploid individual. The increased number of hidden states compared to other algorithms likely results in the increased noise of the called segments.
