# Supplementary material for: Conflation of Short Identity-by-Descent Segments Bias Their Inferred Length Distribution
Source: PubMed Central journal article supplement (PMC4856080; doi:10.1534/g3.116.027581), 2016-03-01

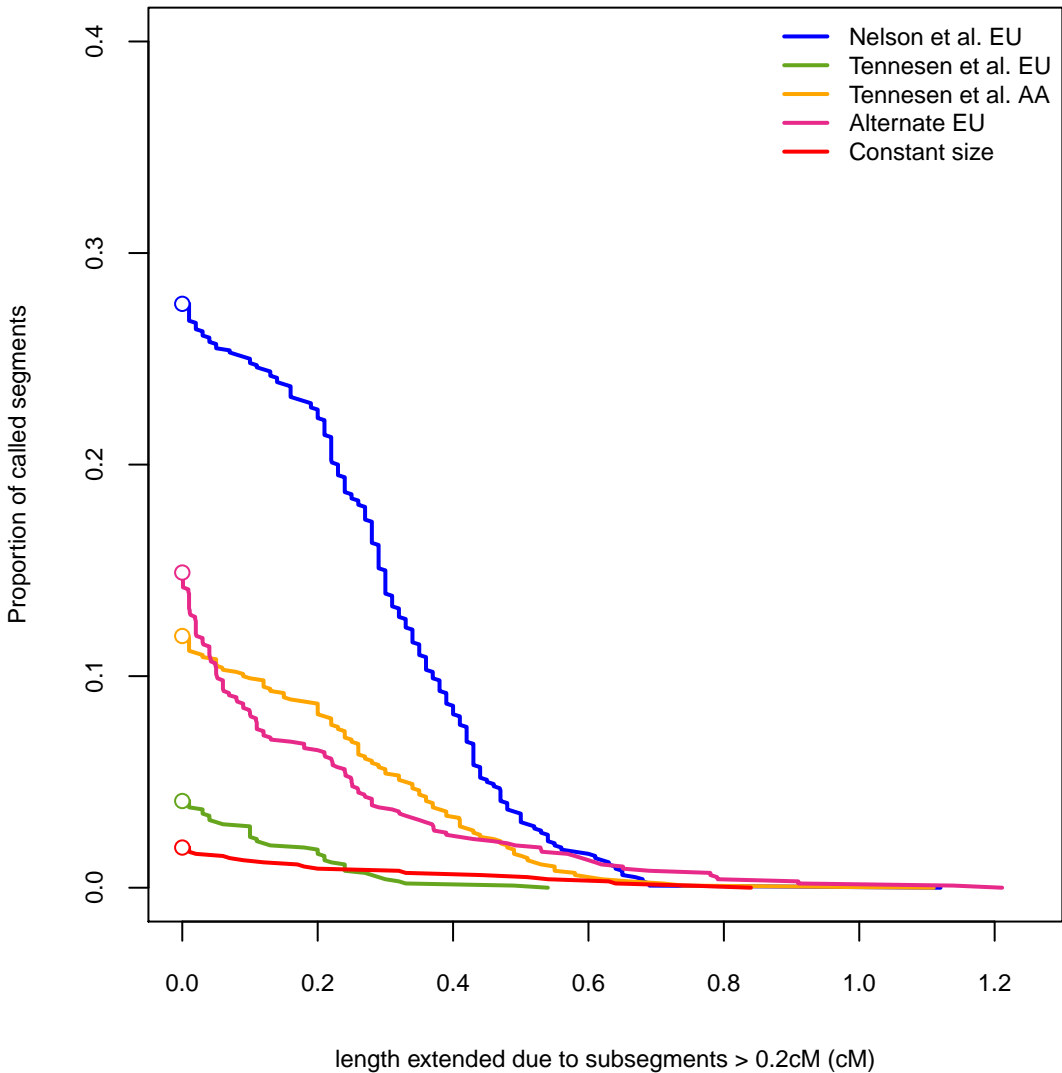

Supplement: supp_g3.116.027581_FigureS5.pdf [file supp_g3.116.027581_FigureS5.pdf]
