# Supplementary material for: Conflation of Short Identity-by-Descent Segments Bias Their Inferred Length Distribution
Source: PubMed Central journal article supplement (PMC4856080; doi:10.1534/g3.116.027581), 2016-03-01
Supplement: supp_g3.116.027581_TableS1.pdf [file supp_g3.116.027581_TableS1.pdf]

**Table S1:** summary of segment age binned by length

| Length bin | Number of segments | Mean age | Max age |
|------------|--------------------|----------|---------|
| [0.1, 0.2) | 33,404,825         | 1134.432 | 2997    |
| [0.2, 0.3) | 5,760,221          | 754.976  | 2974    |
| [0.3, 0.4) | 1,513,440          | 611.934  | 2535    |
| [0.4, 0.5) | 477,898            | 531.359  | 2043    |
| [0.5, 0.6) | 166,887            | 502.269  | 1520    |
| [0.6, 0.7) | 63,098             | 476.703  | 1356    |
| [0.7, 0.8) | 25,216             | 454.187  | 1097    |
| [0.8, 0.9) | 10,314             | 442.023  | 1002    |
| [0.9, 1.0) | 4,361              | 417.529  | 1002    |
| [1.0, 1.1) | 1,967              | 397.696  | 813     |
| [1.1, 1.2) | 879                | 372.242  | 743     |
| [1.2, 1.3) | 479                | 339.493  | 698     |
| [1.3, 1.4) | 213                | 291.944  | 536     |
| [1.4, 1.5) | 138                | 269.775  | 516     |
| [1.5, 1.6) | 82                 | 200.244  | 496     |
| [1.6, 1.7) | 64                 | 126.031  | 506     |
| [1.7, 1.8) | 55                 | 119.873  | 448     |
| [1.8, 1.9) | 33                 | 86.970   | 382     |
| [1.9, 2.0) | 27                 | 107.222  | 465     |
| [2.0, 2.1) | 25                 | 75.040   | 182     |
| [2.1, 2.2) | 22                 | 80.182   | 183     |
| [2.2, 2.3) | 19                 | 63.947   | 112     |
| [2.3, 2.4) | 20                 | 73.850   | 218     |
| [2.4, 2.5) | 17                 | 53.235   | 109     |
| [2.5, 2.6) | 13                 | 55.923   | 115     |
| [2.6, 20)  | 155                | 40.948   | 129     |

These are summaries of ages of IBD<sub>ARG</sub> segments pooled across five 20-Mb simulated regions. IBD<sub>ARG</sub> segments were extracted by sampling ARGs every 0.01cM. For each bin of size 0.1cM, we then computed the number of segments, and the mean, and max ages of the segments. Note that for segments between 0.1 to 0.2cM, the maximum age is near our 3,000 generations threshold, suggesting that there are probably other segments in this length bin (and below) in the dataset that were not detected by our approach.
