# Supplementary material for: Conflation of Short Identity-by-Descent Segments Bias Their Inferred Length Distribution
Source: PubMed Central journal article supplement (PMC4856080; doi:10.1534/g3.116.027581), 2016-03-01
Supplement: supp_g3.116.027581_TableS2.pdf [file supp_g3.116.027581_TableS2.pdf]

**Table S2:** parameter estimates of the age distributions by binned length as a function of mixture of two gamma distribution.

| Length bin | $\lambda_1$ | $\lambda_2$ | $k_1$   | $k_2$   | $\theta_1$ | $\theta_2$ |
|------------|-------------|-------------|---------|---------|------------|------------|
| [0.1, 0.2) | 0.145       | 0.855       | 31.935  | 16.016  | 5.318      | 233.213    |
| [0.2, 0.3) | 0.303       | 0.697       | 42.327  | 11.369  | 8.027      | 108.881    |
| [0.3, 0.4) | 0.472       | 0.528       | 53.242  | 8.772   | 11.056     | 67.058     |
| [0.4, 0.5) | 0.420       | 0.580       | 110.855 | 3.862   | 14.217     | 42.641     |
| [0.5, 0.6) | 0.431       | 0.569       | 185.739 | 2.234   | 18.818     | 30.208     |
| [0.6, 0.7) | 0.638       | 0.362       | 96.634  | 4.433   | 13.333     | 42.125     |
| [0.7, 0.8) | 0.637       | 0.363       | 134.651 | 3.120   | 9.569      | 53.708     |
| [0.8, 0.9) | 0.077       | 0.923       | 2.275   | 195.161 | 50.970     | 8.669      |
| [0.9, 1.0) | 0.155       | 0.845       | 2.006   | 178.235 | 74.907     | 5.721      |
| [1.0, 1.1) | 0.161       | 0.839       | 1.792   | 149.474 | 80.832     | 5.229      |
| [1.1, 1.2) | 0.219       | 0.781       | 1.612   | 134.324 | 99.045     | 4.200      |
| [1.2, 1.3) | 0.270       | 0.730       | 1.601   | 89.074  | 117.072    | 3.522      |
| [1.3, 1.4) | 0.409       | 0.591       | 3.753   | 28.869  | 94.524     | 4.432      |
| [1.4, 1.5) | 0.465       | 0.535       | 3.466   | 32.213  | 159.563    | 2.551      |
| [1.5, 1.6) | 0.659       | 0.341       | 3.026   | 30.547  | 150.939    | 2.707      |
| [1.6, 1.7) | 0.646       | 0.354       | 5.686   | 10.687  | 2.918      | 83.972     |
| [1.7, 1.8) | 0.891       | 0.109       | 4.016   | 20.787  | 230.863    | 1.807      |
| [1.8, 1.9) | 0.954       | 0.046       | 3.220   | 23.367  | 20.424     | 16.284     |
| [1.9, 2.0) | 0.127       | 0.873       | 74.104  | 0.474   | 1.792      | 65.690     |
| [2.0, 2.1) | 0.311       | 0.689       | 22.846  | 1.172   | 9.417      | 10.281     |
| [2.1, 2.2) | 0.931       | 0.069       | 3.123   | 25.672  | 1041.529   | 0.170      |
| [2.2, 2.3) | 0.717       | 0.283       | 2.552   | 18.934  | 152.687    | 0.678      |
| [2.3, 2.4) | 0.848       | 0.152       | 3.173   | 20.154  | 4.212      | 30.693     |
| [2.4, 2.5) | 0.717       | 0.283       | 3.627   | 9.927   | 247.254    | 0.392      |
| [2.5, 2.6) | 0.854       | 0.146       | 3.291   | 16.992  | 12996.000  | 0.009      |
| [2.6, 20)  | 0.819       | 0.181       | 2.206   | 19.722  | 15.941     | 1.844      |

For each binned length the age distribution is modeled as a mixture of two gamma distributions each parameterized with a shape ( $k_i$ ) and scale ( $\theta_i$ ) parameters and weighted by  $\lambda_i$ . The parameters were estimated using an EM algorithm

implemented in the R package mixtools. For bins where more than 1,000 segments are available, a randomly selected subset of 1,000 segments was used for parameter estimation.
